# Supplementary material for: Dysregulation of very-long-chain fatty acid metabolism causes membrane saturation and induction of the unfolded protein response
Source: PubMed Central journal article supplement — Mol Biol Cell. 2020 Jan 1;31(1):7–17. doi: 10.1091/mbc.E19-07-0392 (PMC6938273; doi:10.1091/mbc.e19-07-0392), 2020-01-01
Supplement: mbc-31-7-s001.pdf [file mbc-31-7-s001.pdf]

# Supplemental Materials

*Molecular Biology of the Cell*

Micoogullari et al.
